# Supplementary material for: Metalcarbonyl analogues of annelated cyclooctatetraene and cyclodecapentaene derivatives with a planar core cycle: a quantum chemical study
Source: Royal Society of Chemistry journal article supplement (doi:10.1039/c8cp05444d), 2018-01-01
Supplement: c8cp05444d1.pdf [file c8cp05444d1.pdf]

Supplementary Information

for

**METALCARBONYL ANALOGUES OF ANNELATED  
CYCLOOCTATETRAENE AND CYCLODECAPENTAENE DERIVATIVES  
WITH A PLANAR CORE CYCLE: A QUANTUM CHEMICAL STUDY**

Tatyana N. Gribanova, Ruslan M. Minyaev, Vladimir I. Minkin, and Alexander I. Boldyrev

**Table of contents: Atomic coordinates of optimized structures 15 – 17, 22, 25, 26 calculated by B3LYP/6-311+G(df,p), PBE0/6-311+G(df,p) and wB97XD/6-311+G(df,p) methods:**

pages **S2-S4**: Structure **15**

pages **S5-S7**: Structure **16**

pages **S8-S10**: Structure **17**

pages **S11-S13**: Structure **22**

pages **S14-S16**: Structure **25**

pages **S17-S19**: Structure **26**

## 15 [B3LYP/6-311+G(df,p)]

 $D_4$ 

|    |              |              |              |
|----|--------------|--------------|--------------|
| C  | -1.627506000 | 0.666003000  | -0.008121000 |
| C  | -1.632799000 | -0.653078000 | 0.005412000  |
| C  | -0.665988000 | -1.627433000 | -0.007934000 |
| C  | 0.653080000  | -1.632717000 | 0.005238000  |
| C  | 1.627522000  | -0.665995000 | -0.008110000 |
| C  | 1.632809000  | 0.653087000  | 0.005393000  |
| C  | 0.665998000  | 1.627440000  | -0.007948000 |
| C  | -0.653071000 | 1.632731000  | 0.005215000  |
| Cr | 2.568567000  | -2.588390000 | -0.000048000 |
| Cr | -2.588410000 | -2.568534000 | -0.000060000 |
| Cr | 2.588420000  | 2.568546000  | -0.000090000 |
| Cr | -2.568566000 | 2.588389000  | -0.000036000 |
| C  | 3.890426000  | -1.472739000 | -0.825971000 |
| C  | 2.002459000  | -3.082348000 | -1.780829000 |
| C  | 1.442111000  | -3.901315000 | 0.825514000  |
| C  | 3.064378000  | -2.023432000 | 1.780592000  |
| C  | 2.023490000  | 3.064419000  | 1.780550000  |
| C  | 1.472771000  | 3.890423000  | -0.825986000 |
| C  | 3.901345000  | 1.442083000  | 0.825461000  |
| C  | 3.082294000  | 2.002430000  | -1.780883000 |
| C  | -1.442113000 | 3.901359000  | 0.825473000  |
| C  | -3.064271000 | 2.023397000  | 1.780623000  |
| C  | -3.890399000 | 1.472707000  | -0.825947000 |
| C  | -2.002536000 | 3.082404000  | -1.780826000 |
| C  | -2.023500000 | -3.064346000 | 1.780606000  |
| C  | -3.901360000 | -1.442055000 | 0.825433000  |
| C  | -1.472758000 | -3.890445000 | -0.825902000 |
| C  | -3.082239000 | -2.002465000 | -1.780881000 |
| O  | 4.679962000  | -0.837385000 | -1.348588000 |
| O  | 4.685915000  | 0.800222000  | 1.347613000  |
| O  | 0.837421000  | 4.679964000  | -1.348600000 |
| O  | -3.338849000 | 1.707865000  | 2.839622000  |
| O  | -0.800262000 | 4.685939000  | 1.347619000  |
| O  | -0.837407000 | -4.680007000 | -1.348483000 |
| O  | -3.355936000 | -1.686564000 | -2.840002000 |
| O  | -4.685955000 | -0.800179000 | 1.347529000  |
| O  | 3.339010000  | -1.707928000 | 2.839586000  |
| O  | 1.707956000  | 3.339096000  | 2.839523000  |
| O  | -1.707987000 | -3.338988000 | 2.839593000  |
| O  | -1.686668000 | 3.356205000  | -2.839929000 |
| O  | 3.356010000  | 1.686519000  | -2.839997000 |
| O  | -4.679932000 | 0.837327000  | -1.348538000 |
| O  | 1.686515000  | -3.356116000 | -2.839919000 |
| O  | 0.800264000  | -4.685878000 | 1.347694000  |
| C  | -3.922175000 | 3.951106000  | 0.001837000  |
| C  | 3.951310000  | 3.921983000  | 0.001630000  |
| C  | 3.922088000  | -3.951195000 | 0.001719000  |
| C  | -3.951299000 | -3.921973000 | 0.001678000  |
| O  | 4.759329000  | 4.724576000  | 0.002710000  |
| O  | -4.759317000 | -4.724568000 | 0.002767000  |
| O  | -4.724925000 | 4.758970000  | 0.002962000  |
| O  | 4.724771000  | -4.759126000 | 0.002767000  |

## 15[PBE0/6-311+G(df,p)]

 $D_4$ 

|    |              |              |              |
|----|--------------|--------------|--------------|
| C  | -0.687936000 | -1.620152000 | 0.006820000  |
| C  | -1.620152000 | -0.687936000 | -0.006820000 |
| C  | -1.620152000 | 0.687936000  | 0.006820000  |
| C  | -0.687936000 | 1.620152000  | -0.006820000 |
| C  | 0.687936000  | 1.620152000  | 0.006820000  |
| C  | 1.620152000  | 0.687936000  | -0.006820000 |
| C  | 1.620152000  | -0.687936000 | 0.006820000  |
| C  | 0.687936000  | -1.620152000 | -0.006820000 |
| Cr | 0.000000000  | 3.597928000  | 0.000000000  |
| Cr | -3.597928000 | 0.000000000  | 0.000000000  |
| Cr | 3.597928000  | 0.000000000  | 0.000000000  |
| Cr | 0.000000000  | -3.597928000 | 0.000000000  |
| C  | 1.701091000  | 3.721088000  | 0.811241000  |
| C  | -0.733910000 | 3.543763000  | 1.757805000  |
| C  | -1.701091000 | 3.721088000  | -0.811241000 |
| C  | 0.733910000  | 3.543763000  | -1.757805000 |
| C  | 3.543763000  | -0.733910000 | -1.757805000 |
| C  | 3.721088000  | -1.701091000 | 0.811241000  |
| C  | 3.721088000  | 1.701091000  | -0.811241000 |
| C  | 3.543763000  | 0.733910000  | 1.757805000  |
| C  | 1.701091000  | -3.721088000 | -0.811241000 |
| C  | -0.733910000 | -3.543763000 | -1.757805000 |
| C  | -1.701091000 | -3.721088000 | 0.811241000  |
| C  | 0.733910000  | -3.543763000 | 1.757805000  |
| C  | -3.543763000 | 0.733910000  | -1.757805000 |
| C  | -3.721088000 | -1.701091000 | -0.811241000 |
| C  | -3.721088000 | 1.701091000  | 0.811241000  |
| C  | -3.543763000 | -0.733910000 | 1.757805000  |
| O  | 2.709206000  | 3.807114000  | 1.333418000  |
| O  | 3.807114000  | 2.709206000  | -1.333418000 |
| O  | 3.807114000  | -2.709206000 | 1.333418000  |
| O  | -1.145971000 | -3.507296000 | -2.816311000 |
| O  | 2.709206000  | -3.807114000 | -1.333418000 |
| O  | -3.807114000 | 2.709206000  | 1.333418000  |
| O  | -3.507296000 | -1.145971000 | 2.816311000  |
| O  | -3.807114000 | -2.709206000 | -1.333418000 |
| O  | 1.145971000  | 3.507296000  | -2.816311000 |
| O  | 3.507296000  | -1.145971000 | -2.816311000 |
| O  | -3.507296000 | 1.145971000  | -2.816311000 |
| O  | 1.145971000  | -3.507296000 | 2.816311000  |
| O  | 3.507296000  | 1.145971000  | 2.816311000  |
| O  | -2.709206000 | -3.807114000 | 1.333418000  |
| O  | -1.145971000 | 3.507296000  | 2.816311000  |
| O  | -2.709206000 | 3.807114000  | -1.333418000 |
| C  | 0.000000000  | -5.490932000 | 0.000000000  |
| C  | 5.490932000  | 0.000000000  | 0.000000000  |
| C  | 0.000000000  | 5.490932000  | 0.000000000  |
| C  | -5.490932000 | 0.000000000  | 0.000000000  |
| O  | 6.627574000  | 0.000000000  | 0.000000000  |
| O  | -6.627574000 | 0.000000000  | 0.000000000  |
| O  | 0.000000000  | -6.627574000 | 0.000000000  |
| O  | 0.000000000  | 6.627574000  | 0.000000000  |

## 15[wB97XD/6-311+G(df,p)]

 $D_4$ 

|    |              |              |              |
|----|--------------|--------------|--------------|
| C  | -0.688740000 | -1.617903000 | 0.007484000  |
| C  | -1.617903000 | -0.688740000 | -0.007484000 |
| C  | -1.617903000 | 0.688740000  | 0.007484000  |
| C  | -0.688740000 | 1.617903000  | -0.007484000 |
| C  | 0.688740000  | 1.617903000  | 0.007484000  |
| C  | 1.617903000  | 0.688740000  | -0.007484000 |
| C  | 1.617903000  | -0.688740000 | 0.007484000  |
| C  | 0.688740000  | -1.617903000 | -0.007484000 |
| Cr | 0.000000000  | 3.597079000  | 0.000000000  |
| Cr | -3.597079000 | 0.000000000  | 0.000000000  |
| Cr | 3.597079000  | 0.000000000  | 0.000000000  |
| Cr | 0.000000000  | -3.597079000 | 0.000000000  |
| C  | 1.720853000  | 3.730514000  | 0.803811000  |
| C  | -0.722934000 | 3.516550000  | 1.775975000  |
| C  | -1.720853000 | 3.730514000  | -0.803811000 |
| C  | 0.722934000  | 3.516550000  | -1.775975000 |
| C  | 3.516550000  | -0.722934000 | -1.775975000 |
| C  | 3.730514000  | -1.720853000 | 0.803811000  |
| C  | 3.730514000  | 1.720853000  | -0.803811000 |
| C  | 3.516550000  | 0.722934000  | 1.775975000  |
| C  | 1.720853000  | -3.730514000 | -0.803811000 |
| C  | -0.722934000 | -3.516550000 | -1.775975000 |
| C  | -1.720853000 | -3.730514000 | 0.803811000  |
| C  | 0.722934000  | -3.516550000 | 1.775975000  |
| C  | -3.516550000 | 0.722934000  | -1.775975000 |
| C  | -3.730514000 | -1.720853000 | -0.803811000 |
| C  | -3.730514000 | 1.720853000  | 0.803811000  |
| C  | -3.516550000 | -0.722934000 | 1.775975000  |
| O  | 2.729749000  | 3.810767000  | 1.321777000  |
| O  | 3.810767000  | 2.729749000  | -1.321777000 |
| O  | 3.810767000  | -2.729749000 | 1.321777000  |
| O  | -1.126132000 | -3.444908000 | -2.834245000 |
| O  | 2.729749000  | -3.810767000 | -1.321777000 |
| O  | -3.810767000 | 2.729749000  | 1.321777000  |
| O  | -3.444908000 | -1.126132000 | 2.834245000  |
| O  | -3.810767000 | -2.729749000 | -1.321777000 |
| O  | 1.126132000  | 3.444908000  | -2.834245000 |
| O  | 3.444908000  | -1.126132000 | -2.834245000 |
| O  | -3.444908000 | 1.126132000  | -2.834245000 |
| O  | 1.126132000  | -3.444908000 | 2.834245000  |
| O  | 3.444908000  | 1.126132000  | 2.834245000  |
| O  | -2.729749000 | -3.810767000 | 1.321777000  |
| O  | -1.126132000 | 3.444908000  | 2.834245000  |
| O  | -2.729749000 | 3.810767000  | -1.321777000 |
| C  | 0.000000000  | -5.511069000 | 0.000000000  |
| C  | 5.511069000  | 0.000000000  | 0.000000000  |
| C  | 0.000000000  | 5.511069000  | 0.000000000  |
| C  | -5.511069000 | 0.000000000  | 0.000000000  |
| O  | 6.645641000  | 0.000000000  | 0.000000000  |
| O  | -6.645641000 | 0.000000000  | 0.000000000  |
| O  | 0.000000000  | -6.645641000 | 0.000000000  |
| O  | 0.000000000  | 6.645641000  | 0.000000000  |

**16 [B3LYP/6-311+G(df,p)]**

(the geometry with the help “stable=opt” procedure has been found)

C<sub>s</sub>

|    |              |              |              |
|----|--------------|--------------|--------------|
| C  | -0.666233000 | 1.647527000  | 0.000000000  |
| C  | 0.646789000  | 1.655230000  | 0.000000000  |
| C  | 1.647567000  | 0.666179000  | 0.000000000  |
| C  | 1.655243000  | -0.646844000 | 0.000000000  |
| C  | 0.666191000  | -1.647623000 | 0.000000000  |
| C  | -0.646832000 | -1.655293000 | 0.000000000  |
| C  | -1.647611000 | -0.666242000 | 0.000000000  |
| C  | -1.655316000 | 0.646781000  | 0.000000000  |
| Fe | 2.499769000  | -2.470633000 | 0.000000000  |
| Fe | 2.470555000  | 2.499772000  | 0.000000000  |
| Fe | -2.470604000 | -2.499838000 | 0.000000000  |
| Fe | -2.499796000 | 2.470582000  | 0.000000000  |
| C  | 2.247034000  | -4.280441000 | 0.000000000  |
| C  | 2.384509000  | -2.356301000 | 1.832625000  |
| C  | 4.306602000  | -2.197382000 | 0.000000000  |
| C  | 2.384509000  | -2.356301000 | -1.832625000 |
| C  | -2.356178000 | -2.384641000 | -1.832621000 |
| C  | -4.280425000 | -2.247139000 | 0.000000000  |
| C  | -2.197316000 | -4.306657000 | 0.000000000  |
| C  | -2.356178000 | -2.384641000 | 1.832621000  |
| C  | -4.306491000 | 2.196516000  | 0.000000000  |
| C  | -2.384143000 | 2.356610000  | -1.832623000 |
| C  | -2.247865000 | 4.280517000  | 0.000000000  |
| C  | -2.384143000 | 2.356610000  | 1.832623000  |
| C  | 2.356136000  | 2.384581000  | -1.832626000 |
| C  | 2.197256000  | 4.306590000  | 0.000000000  |
| C  | 4.280376000  | 2.247065000  | 0.000000000  |
| C  | 2.356136000  | 2.384581000  | 1.832626000  |
| O  | 2.042858000  | -5.400707000 | 0.000000000  |
| O  | -1.980557000 | -5.424559000 | 0.000000000  |
| O  | -5.400686000 | -2.042941000 | 0.000000000  |
| O  | -2.297687000 | 2.272083000  | -2.961960000 |
| O  | -5.424270000 | 1.979135000  | 0.000000000  |
| O  | 5.400635000  | 2.042855000  | 0.000000000  |
| O  | 2.271225000  | 2.298433000  | 2.961957000  |
| O  | 1.980480000  | 5.424488000  | 0.000000000  |
| O  | 2.298648000  | -2.270866000 | -2.961939000 |
| O  | -2.271254000 | -2.298479000 | -2.961951000 |
| O  | 2.271225000  | 2.298433000  | -2.961957000 |
| O  | -2.297687000 | 2.272083000  | 2.961960000  |
| O  | -2.271254000 | -2.298479000 | 2.961951000  |
| O  | -2.044286000 | 5.400893000  | 0.000000000  |
| O  | 2.298648000  | -2.270866000 | 2.961939000  |
| O  | 5.424496000  | -1.980588000 | 0.000000000  |

**16 [PBE0/6-311+G(df,p)]**

(the geometry with the help “stable=opt” procedure has been found)

*D*<sub>4h</sub>

|    |              |              |              |
|----|--------------|--------------|--------------|
| C  | -0.656432000 | 1.650733000  | 0.000000000  |
| C  | 0.656432000  | 1.650733000  | 0.000000000  |
| C  | 1.650733000  | 0.656432000  | 0.000000000  |
| C  | 1.650733000  | -0.656432000 | 0.000000000  |
| C  | 0.656432000  | -1.650733000 | 0.000000000  |
| C  | -0.656432000 | -1.650733000 | 0.000000000  |
| C  | -1.650733000 | -0.656432000 | 0.000000000  |
| C  | -1.650733000 | 0.656432000  | 0.000000000  |
| Fe | 2.462826000  | -2.462826000 | 0.000000000  |
| Fe | 2.462826000  | 2.462826000  | 0.000000000  |
| Fe | -2.462826000 | -2.462826000 | 0.000000000  |
| Fe | -2.462826000 | 2.462826000  | 0.000000000  |
| C  | 2.198872000  | -4.245735000 | 0.000000000  |
| C  | 2.337042000  | -2.337042000 | 1.806715000  |
| C  | 4.245735000  | -2.198872000 | 0.000000000  |
| C  | 2.337042000  | -2.337042000 | -1.806715000 |
| C  | -2.337042000 | -2.337042000 | -1.806715000 |
| C  | -4.245735000 | -2.198872000 | 0.000000000  |
| C  | -2.198872000 | -4.245735000 | 0.000000000  |
| C  | -2.337042000 | -2.337042000 | 1.806715000  |
| C  | -4.245735000 | 2.198872000  | 0.000000000  |
| C  | -2.337042000 | 2.337042000  | -1.806715000 |
| C  | -2.198872000 | 4.245735000  | 0.000000000  |
| C  | -2.337042000 | 2.337042000  | 1.806715000  |
| C  | 2.337042000  | 2.337042000  | -1.806715000 |
| C  | 2.198872000  | 4.245735000  | 0.000000000  |
| C  | 4.245735000  | 2.198872000  | 0.000000000  |
| C  | 2.337042000  | 2.337042000  | 1.806715000  |
| O  | 1.983554000  | -5.361600000 | 0.000000000  |
| O  | -1.983554000 | -5.361600000 | 0.000000000  |
| O  | -5.361600000 | -1.983554000 | 0.000000000  |
| O  | -2.236979000 | 2.236979000  | -2.931514000 |
| O  | -5.361600000 | 1.983554000  | 0.000000000  |
| O  | 5.361600000  | 1.983554000  | 0.000000000  |
| O  | 2.236979000  | 2.236979000  | 2.931514000  |
| O  | 1.983554000  | 5.361600000  | 0.000000000  |
| O  | 2.236979000  | -2.236979000 | -2.931514000 |
| O  | -2.236979000 | -2.236979000 | -2.931514000 |
| O  | 2.236979000  | 2.236979000  | -2.931514000 |
| O  | -2.236979000 | 2.236979000  | 2.931514000  |
| O  | -2.236979000 | -2.236979000 | 2.931514000  |
| O  | -1.983554000 | 5.361600000  | 0.000000000  |
| O  | 2.236979000  | -2.236979000 | 2.931514000  |
| O  | 5.361600000  | -1.983554000 | 0.000000000  |

## 16 [wB97XD/6-311+G(df,p)]

 $D_{4h}$ 

|    |              |              |              |
|----|--------------|--------------|--------------|
| C  | -0.655386000 | 1.650190000  | 0.000000000  |
| C  | 0.655386000  | 1.650190000  | 0.000000000  |
| C  | 1.650190000  | 0.655386000  | 0.000000000  |
| C  | 1.650190000  | -0.655386000 | 0.000000000  |
| C  | 0.655386000  | -1.650190000 | 0.000000000  |
| C  | -0.655386000 | -1.650190000 | 0.000000000  |
| C  | -1.650190000 | -0.655386000 | 0.000000000  |
| C  | -1.650190000 | 0.655386000  | 0.000000000  |
| Fe | 2.462099000  | -2.462099000 | 0.000000000  |
| Fe | 2.462099000  | 2.462099000  | 0.000000000  |
| Fe | -2.462099000 | -2.462099000 | 0.000000000  |
| Fe | -2.462099000 | 2.462099000  | 0.000000000  |
| C  | 2.180985000  | -4.259342000 | 0.000000000  |
| C  | 2.324993000  | -2.324993000 | 1.818933000  |
| C  | 4.259342000  | -2.180985000 | 0.000000000  |
| C  | 2.324993000  | -2.324993000 | -1.818933000 |
| C  | -2.324993000 | -2.324993000 | -1.818933000 |
| C  | -4.259342000 | -2.180985000 | 0.000000000  |
| C  | -2.180985000 | -4.259342000 | 0.000000000  |
| C  | -2.324993000 | -2.324993000 | 1.818933000  |
| C  | -4.259342000 | 2.180985000  | 0.000000000  |
| C  | -2.324993000 | 2.324993000  | -1.818933000 |
| C  | -2.180985000 | 4.259342000  | 0.000000000  |
| C  | -2.324993000 | 2.324993000  | 1.818933000  |
| C  | 2.324993000  | 2.324993000  | -1.818933000 |
| C  | 2.180985000  | 4.259342000  | 0.000000000  |
| C  | 4.259342000  | 2.180985000  | 0.000000000  |
| C  | 2.324993000  | 2.324993000  | 1.818933000  |
| O  | 1.944099000  | -5.368985000 | 0.000000000  |
| O  | -1.944099000 | -5.368985000 | 0.000000000  |
| O  | -5.368985000 | -1.944099000 | 0.000000000  |
| O  | -2.206703000 | 2.206703000  | -2.938343000 |
| O  | -5.368985000 | 1.944099000  | 0.000000000  |
| O  | 5.368985000  | 1.944099000  | 0.000000000  |
| O  | 2.206703000  | 2.206703000  | 2.938343000  |
| O  | 1.944099000  | 5.368985000  | 0.000000000  |
| O  | 2.206703000  | -2.206703000 | -2.938343000 |
| O  | -2.206703000 | -2.206703000 | -2.938343000 |
| O  | 2.206703000  | 2.206703000  | -2.938343000 |
| O  | -2.206703000 | 2.206703000  | 2.938343000  |
| O  | -2.206703000 | -2.206703000 | 2.938343000  |
| O  | -1.944099000 | 5.368985000  | 0.000000000  |
| O  | 2.206703000  | -2.206703000 | 2.938343000  |
| O  | 5.368985000  | -1.944099000 | 0.000000000  |

## 17 [B3LYP/6-311+G(df,p)]

C<sub>4h</sub>

|    |              |              |              |
|----|--------------|--------------|--------------|
| C  | -1.479964000 | 0.879824000  | 0.000000000  |
| C  | -1.735728000 | -0.405442000 | 0.000000000  |
| C  | -0.879824000 | -1.479964000 | 0.000000000  |
| C  | 0.405442000  | -1.735728000 | 0.000000000  |
| C  | 1.479964000  | -0.879824000 | 0.000000000  |
| C  | 1.735728000  | 0.405442000  | 0.000000000  |
| C  | 0.879824000  | 1.479964000  | 0.000000000  |
| C  | -0.405442000 | 1.735728000  | 0.000000000  |
| Ni | 2.777948000  | 2.075744000  | 0.000000000  |
| Ni | -2.075744000 | 2.777948000  | 0.000000000  |
| Ni | -2.777948000 | -2.075744000 | 0.000000000  |
| Ni | 2.075744000  | -2.777948000 | 0.000000000  |
| C  | -3.129610000 | 2.646751000  | 1.543725000  |
| C  | -1.275339000 | 4.422437000  | 0.000000000  |
| C  | -3.129610000 | 2.646751000  | -1.543725000 |
| C  | 2.646751000  | 3.129610000  | 1.543725000  |
| C  | 2.646751000  | 3.129610000  | -1.543725000 |
| C  | 4.422437000  | 1.275339000  | 0.000000000  |
| C  | 3.129610000  | -2.646751000 | -1.543725000 |
| C  | 1.275339000  | -4.422437000 | 0.000000000  |
| C  | 3.129610000  | -2.646751000 | 1.543725000  |
| C  | -2.646751000 | -3.129610000 | -1.543725000 |
| C  | -2.646751000 | -3.129610000 | 1.543725000  |
| C  | -4.422437000 | -1.275339000 | 0.000000000  |
| O  | 2.506128000  | 3.739219000  | 2.489751000  |
| O  | 2.506128000  | 3.739219000  | -2.489751000 |
| O  | 5.396079000  | 0.691274000  | 0.000000000  |
| O  | -2.506128000 | -3.739219000 | 2.489751000  |
| O  | -5.396079000 | -0.691274000 | 0.000000000  |
| O  | -2.506128000 | -3.739219000 | -2.489751000 |
| O  | 3.739219000  | -2.506128000 | 2.489751000  |
| O  | -3.739219000 | 2.506128000  | -2.489751000 |
| O  | -3.739219000 | 2.506128000  | 2.489751000  |
| O  | 3.739219000  | -2.506128000 | -2.489751000 |
| O  | 0.691274000  | -5.396079000 | 0.000000000  |
| O  | -0.691274000 | 5.396079000  | 0.000000000  |



**17 [PBE0/6-311+G(df,p)]**

(the geometry with the help “stable=opt” procedure has been found)

S<sub>4</sub>

|    |              |              |              |
|----|--------------|--------------|--------------|
| C  | 0.669943000  | 1.620335000  | 0.014523000  |
| C  | 1.620335000  | 0.669943000  | -0.014523000 |
| C  | 1.620335000  | -0.669943000 | -0.014523000 |
| C  | 0.669943000  | -1.620335000 | 0.014523000  |
| C  | -0.669943000 | -1.620335000 | 0.014523000  |
| C  | -1.620335000 | -0.669943000 | -0.014523000 |
| C  | -1.620335000 | 0.669943000  | -0.014523000 |
| C  | -0.669943000 | 1.620335000  | 0.014523000  |
| Ni | -3.457797000 | 0.000000000  | -0.031439000 |
| Ni | 0.000000000  | 3.457797000  | 0.031439000  |
| Ni | 3.457797000  | 0.000000000  | -0.031439000 |
| Ni | 0.000000000  | -3.457797000 | 0.031439000  |
| C  | 1.471195000  | 4.155078000  | -0.759264000 |
| C  | -1.471195000 | 4.155078000  | -0.759264000 |
| C  | 0.000000000  | 3.909910000  | 1.875791000  |
| C  | -3.909910000 | 0.000000000  | -1.875791000 |
| C  | -4.155078000 | 1.471195000  | 0.759264000  |
| C  | -4.155078000 | -1.471195000 | 0.759264000  |
| C  | 0.000000000  | -3.909910000 | 1.875791000  |
| C  | 1.471195000  | -4.155078000 | -0.759264000 |
| C  | -1.471195000 | -4.155078000 | -0.759264000 |
| C  | 4.155078000  | -1.471195000 | 0.759264000  |
| C  | 3.909910000  | 0.000000000  | -1.875791000 |
| C  | 4.155078000  | 1.471195000  | 0.759264000  |
| O  | -4.081361000 | 0.000000000  | -2.993156000 |
| O  | -4.514922000 | 2.416994000  | 1.269999000  |
| O  | -4.514922000 | -2.416994000 | 1.269999000  |
| O  | 4.081361000  | 0.000000000  | -2.993156000 |
| O  | 4.514922000  | 2.416994000  | 1.269999000  |
| O  | 4.514922000  | -2.416994000 | 1.269999000  |
| O  | -2.416994000 | -4.514922000 | -1.269999000 |
| O  | 0.000000000  | 4.081361000  | 2.993156000  |
| O  | 2.416994000  | 4.514922000  | -1.269999000 |
| O  | 0.000000000  | -4.081361000 | 2.993156000  |
| O  | 2.416994000  | -4.514922000 | -1.269999000 |
| O  | -2.416994000 | 4.514922000  | -1.269999000 |

**17 [wB97XD/6-311+G(df,p)]**

(the geometry with the help “stable=opt” procedure has been found)

S<sub>4</sub>

|    |              |              |              |
|----|--------------|--------------|--------------|
| C  | 1.644878000  | -0.631635000 | 0.013502000  |
| C  | 0.631685000  | -1.644845000 | -0.013473000 |
| C  | -0.631635000 | -1.644878000 | -0.013502000 |
| C  | -1.644845000 | -0.631685000 | 0.013473000  |
| C  | -1.644878000 | 0.631635000  | 0.013502000  |
| C  | -0.631685000 | 1.644845000  | -0.013473000 |
| C  | 0.631635000  | 1.644878000  | -0.013502000 |
| C  | 1.644845000  | 0.631685000  | 0.013473000  |
| Ni | -0.000043000 | 3.513397000  | 0.008637000  |
| Ni | 3.513397000  | 0.000043000  | -0.008637000 |
| Ni | 0.000043000  | -3.513397000 | 0.008637000  |
| Ni | -3.513397000 | -0.000043000 | -0.008637000 |
| C  | 4.253838000  | -1.489235000 | -0.751616000 |
| C  | 4.253779000  | 1.489859000  | -0.750537000 |
| C  | 3.961623000  | -0.000527000 | 1.917618000  |
| C  | 0.000527000  | 3.961623000  | -1.917618000 |
| C  | 1.489235000  | 4.253838000  | 0.751616000  |
| C  | -1.489859000 | 4.253779000  | 0.750537000  |
| C  | -3.961623000 | 0.000527000  | 1.917618000  |
| C  | -4.253779000 | -1.489859000 | -0.750537000 |
| C  | -4.253838000 | 1.489235000  | -0.751616000 |
| C  | -1.489235000 | -4.253838000 | 0.751616000  |
| C  | -0.000527000 | -3.961623000 | -1.917618000 |
| C  | 1.489859000  | -4.253779000 | 0.750537000  |
| O  | 0.000811000  | 4.060254000  | -3.041548000 |
| O  | 2.436770000  | 4.638661000  | 1.238052000  |
| O  | -2.437765000 | 4.638661000  | 1.236195000  |
| O  | -0.000811000 | -4.060254000 | -3.041548000 |
| O  | 2.437765000  | -4.638661000 | 1.236195000  |
| O  | -2.436770000 | -4.638661000 | 1.238052000  |
| O  | -4.638661000 | 2.436770000  | -1.238052000 |
| O  | 4.060254000  | -0.000811000 | 3.041548000  |
| O  | 4.638661000  | -2.436770000 | -1.238052000 |
| O  | -4.060254000 | 0.000811000  | 3.041548000  |
| O  | -4.638661000 | -2.437765000 | -1.236195000 |
| O  | 4.638661000  | 2.437765000  | -1.236195000 |

**22 [B3LYP/6-311+G(df,p)]***D<sub>4h</sub>*

|    |              |              |             |
|----|--------------|--------------|-------------|
| C  | 0.645115000  | 1.659147000  | 0.000000000 |
| C  | 1.659147000  | 0.645115000  | 0.000000000 |
| C  | 1.659147000  | -0.645115000 | 0.000000000 |
| C  | 0.645115000  | -1.659147000 | 0.000000000 |
| C  | -0.645115000 | -1.659147000 | 0.000000000 |
| C  | -1.659147000 | -0.645115000 | 0.000000000 |
| C  | -1.659147000 | 0.645115000  | 0.000000000 |
| C  | -0.645115000 | 1.659147000  | 0.000000000 |
| Ni | 0.000000000  | -3.439168000 | 0.000000000 |
| Ni | 3.439168000  | 0.000000000  | 0.000000000 |
| Ni | -3.439168000 | 0.000000000  | 0.000000000 |
| Ni | 0.000000000  | 3.439168000  | 0.000000000 |
| C  | -1.472564000 | -4.495185000 | 0.000000000 |
| C  | 1.472564000  | -4.495185000 | 0.000000000 |
| C  | -4.495185000 | 1.472564000  | 0.000000000 |
| C  | -4.495185000 | -1.472564000 | 0.000000000 |
| C  | -1.472564000 | 4.495185000  | 0.000000000 |
| C  | 1.472564000  | 4.495185000  | 0.000000000 |
| C  | 4.495185000  | 1.472564000  | 0.000000000 |
| C  | 4.495185000  | -1.472564000 | 0.000000000 |
| O  | -2.414822000 | -5.128962000 | 0.000000000 |
| O  | -5.128962000 | -2.414822000 | 0.000000000 |
| O  | -5.128962000 | 2.414822000  | 0.000000000 |
| O  | -2.414822000 | 5.128962000  | 0.000000000 |
| O  | 5.128962000  | -2.414822000 | 0.000000000 |
| O  | 5.128962000  | 2.414822000  | 0.000000000 |
| O  | 2.414822000  | 5.128962000  | 0.000000000 |
| O  | 2.414822000  | -5.128962000 | 0.000000000 |

**22 [PBE0/6-311+G(df,p)]***D<sub>4h</sub>*

|    |              |              |             |
|----|--------------|--------------|-------------|
| C  | 0.646227000  | 1.657913000  | 0.000000000 |
| C  | 1.657913000  | 0.646227000  | 0.000000000 |
| C  | 1.657913000  | -0.646227000 | 0.000000000 |
| C  | 0.646227000  | -1.657913000 | 0.000000000 |
| C  | -0.646227000 | -1.657913000 | 0.000000000 |
| C  | -1.657913000 | -0.646227000 | 0.000000000 |
| C  | -1.657913000 | 0.646227000  | 0.000000000 |
| C  | -0.646227000 | 1.657913000  | 0.000000000 |
| Ni | 0.000000000  | -3.413552000 | 0.000000000 |
| Ni | 3.413552000  | 0.000000000  | 0.000000000 |
| Ni | -3.413552000 | 0.000000000  | 0.000000000 |
| Ni | 0.000000000  | 3.413552000  | 0.000000000 |
| C  | -1.464714000 | -4.447246000 | 0.000000000 |
| C  | 1.464714000  | -4.447246000 | 0.000000000 |
| C  | -4.447246000 | 1.464714000  | 0.000000000 |
| C  | -4.447246000 | -1.464714000 | 0.000000000 |
| C  | -1.464714000 | 4.447246000  | 0.000000000 |
| C  | 1.464714000  | 4.447246000  | 0.000000000 |
| C  | 4.447246000  | 1.464714000  | 0.000000000 |
| C  | 4.447246000  | -1.464714000 | 0.000000000 |
| O  | -2.414422000 | -5.065541000 | 0.000000000 |
| O  | -5.065541000 | -2.414422000 | 0.000000000 |
| O  | -5.065541000 | 2.414422000  | 0.000000000 |
| O  | -2.414422000 | 5.065541000  | 0.000000000 |
| O  | 5.065541000  | -2.414422000 | 0.000000000 |
| O  | 5.065541000  | 2.414422000  | 0.000000000 |
| O  | 2.414422000  | 5.065541000  | 0.000000000 |
| O  | 2.414422000  | -5.065541000 | 0.000000000 |

**22[wB97XD/6-311+G(df,p)]***D<sub>4h</sub>*

|    |              |              |             |
|----|--------------|--------------|-------------|
| C  | 0.642218000  | 1.658814000  | 0.000000000 |
| C  | 1.658814000  | 0.642218000  | 0.000000000 |
| C  | 1.658814000  | -0.642218000 | 0.000000000 |
| C  | 0.642218000  | -1.658814000 | 0.000000000 |
| C  | -0.642218000 | -1.658814000 | 0.000000000 |
| C  | -1.658814000 | -0.642218000 | 0.000000000 |
| C  | -1.658814000 | 0.642218000  | 0.000000000 |
| C  | -0.642218000 | 1.658814000  | 0.000000000 |
| Ni | 0.000000000  | -3.421834000 | 0.000000000 |
| Ni | 3.421834000  | 0.000000000  | 0.000000000 |
| Ni | -3.421834000 | 0.000000000  | 0.000000000 |
| Ni | 0.000000000  | 3.421834000  | 0.000000000 |
| C  | -1.481686000 | -4.454909000 | 0.000000000 |
| C  | 1.481686000  | -4.454909000 | 0.000000000 |
| C  | -4.454909000 | 1.481686000  | 0.000000000 |
| C  | -4.454909000 | -1.481686000 | 0.000000000 |
| C  | -1.481686000 | 4.454909000  | 0.000000000 |
| C  | 1.481686000  | 4.454909000  | 0.000000000 |
| C  | 4.454909000  | 1.481686000  | 0.000000000 |
| C  | 4.454909000  | -1.481686000 | 0.000000000 |
| O  | -2.435616000 | -5.063256000 | 0.000000000 |
| O  | -5.063256000 | -2.435616000 | 0.000000000 |
| O  | -5.063256000 | 2.435616000  | 0.000000000 |
| O  | -2.435616000 | 5.063256000  | 0.000000000 |
| O  | 5.063256000  | -2.435616000 | 0.000000000 |
| O  | 5.063256000  | 2.435616000  | 0.000000000 |
| O  | 2.435616000  | 5.063256000  | 0.000000000 |
| O  | 2.435616000  | -5.063256000 | 0.000000000 |

## 25 [B3LYP/6-311+G(df,p)]

C<sub>s</sub>

|    |              |              |              |
|----|--------------|--------------|--------------|
| C  | 2.045239000  | 0.713409000  | 0.000000000  |
| C  | 1.237625000  | 1.776226000  | 0.000000000  |
| C  | -0.047100000 | 2.164341000  | 0.000000000  |
| C  | -1.308105000 | 1.726516000  | 0.000000000  |
| C  | -2.074606000 | 0.624692000  | 0.000000000  |
| C  | -2.046288000 | -0.709899000 | 0.000000000  |
| C  | -1.234453000 | -1.778681000 | 0.000000000  |
| C  | 0.043321000  | -2.164693000 | 0.000000000  |
| C  | 1.311094000  | -1.724087000 | 0.000000000  |
| C  | 2.073612000  | -0.628425000 | 0.000000000  |
| Fe | -1.315373000 | 3.781064000  | 0.000000000  |
| Fe | -4.003222000 | -0.083430000 | 0.000000000  |
| Fe | 3.188699000  | 2.420604000  | 0.000000000  |
| Fe | 3.287363000  | -2.286399000 | 0.000000000  |
| Fe | -1.157329000 | -3.831921000 | 0.000000000  |
| C  | -0.336192000 | 5.315363000  | 0.000000000  |
| C  | -3.034347000 | 4.379701000  | 0.000000000  |
| C  | -1.268638000 | 3.645101000  | 1.833043000  |
| C  | -1.268638000 | 3.645101000  | -1.833043000 |
| C  | 3.073819000  | 2.333960000  | -1.833007000 |
| C  | 3.224972000  | 4.240271000  | 0.000000000  |
| C  | 3.073819000  | 2.333960000  | 1.833007000  |
| C  | 4.951168000  | 1.965687000  | 0.000000000  |
| C  | 5.029700000  | -1.759883000 | 0.000000000  |
| C  | -1.115247000 | -3.694687000 | -1.833115000 |
| C  | -0.117864000 | -5.326161000 | 0.000000000  |
| C  | -2.851075000 | -4.498648000 | 0.000000000  |
| C  | 3.169866000  | -2.203777000 | 1.833028000  |
| C  | -3.859251000 | -0.080751000 | -1.833018000 |
| C  | -5.102829000 | -1.533888000 | 0.000000000  |
| C  | -3.859251000 | -0.080751000 | 1.833018000  |
| C  | -5.160724000 | 1.321409000  | 0.000000000  |
| C  | 3.169866000  | -2.203777000 | -1.833028000 |
| C  | 3.395828000  | -4.103164000 | 0.000000000  |
| C  | -1.115247000 | -3.694687000 | 1.833115000  |
| O  | 6.060477000  | 1.704860000  | 0.000000000  |
| O  | 2.977025000  | 2.261157000  | -2.963007000 |
| O  | 3.273287000  | 5.378815000  | 0.000000000  |
| O  | 6.127456000  | -1.454007000 | 0.000000000  |
| O  | -5.811329000 | -2.426438000 | 0.000000000  |
| O  | -3.738191000 | -0.078458000 | -2.963026000 |
| O  | -5.904191000 | 2.185028000  | 0.000000000  |
| O  | -3.738191000 | -0.078458000 | 2.963026000  |
| O  | -3.902062000 | -4.939118000 | 0.000000000  |
| O  | 0.255692000  | 6.289147000  | 0.000000000  |
| O  | -4.101992000 | 4.778146000  | 0.000000000  |
| O  | 3.488381000  | -5.238953000 | 0.000000000  |
| O  | 3.071290000  | -2.134380000 | -2.963086000 |
| O  | 0.511634000  | -6.276082000 | 0.000000000  |
| O  | -1.079891000 | -3.579412000 | -2.963176000 |
| O  | 2.977025000  | 2.261157000  | 2.963007000  |
| O  | 3.071290000  | -2.134380000 | 2.963086000  |
| O  | -1.229162000 | 3.530610000  | 2.963045000  |
| O  | -1.229162000 | 3.530610000  | -2.963045000 |
| O  | -1.079891000 | -3.579412000 | 2.963176000  |

## 25 [PBE0/6-311+G(df,p)]

C<sub>s</sub>

|    |              |              |              |
|----|--------------|--------------|--------------|
| C  | -0.696287000 | 2.052319000  | 0.000000000  |
| C  | -1.770099000 | 1.250775000  | 0.000000000  |
| C  | -2.167037000 | -0.027884000 | 0.000000000  |
| C  | -1.736141000 | -1.296680000 | 0.000000000  |
| C  | -0.642893000 | -2.069500000 | 0.000000000  |
| C  | 0.696978000  | -2.052172000 | 0.000000000  |
| C  | 1.769766000  | -1.251153000 | 0.000000000  |
| C  | 2.167153000  | 0.028560000  | 0.000000000  |
| C  | 1.736810000  | 1.296323000  | 0.000000000  |
| C  | 0.642436000  | 2.069516000  | 0.000000000  |
| Fe | -3.755140000 | -1.275107000 | 0.000000000  |
| Fe | 0.051851000  | -3.965469000 | 0.000000000  |
| Fe | -2.372675000 | 3.177830000  | 0.000000000  |
| Fe | 2.288590000  | 3.238696000  | 0.000000000  |
| Fe | 3.787550000  | -1.175914000 | 0.000000000  |
| C  | -5.264124000 | -0.301220000 | 0.000000000  |
| C  | -4.354083000 | -2.968133000 | 0.000000000  |
| C  | -3.603157000 | -1.222556000 | 1.808041000  |
| C  | -3.603157000 | -1.222556000 | -1.808041000 |
| C  | -2.276228000 | 3.049235000  | -1.808028000 |
| C  | -4.167892000 | 3.226165000  | 0.000000000  |
| C  | -2.276228000 | 3.049235000  | 1.808028000  |
| C  | -1.911690000 | 4.913658000  | 0.000000000  |
| C  | 1.778455000  | 4.960630000  | 0.000000000  |
| C  | 3.633645000  | -1.128844000 | -1.808014000 |
| C  | 5.268180000  | -0.159607000 | 0.000000000  |
| C  | 4.434961000  | -2.851157000 | 0.000000000  |
| C  | 2.196320000  | 3.107135000  | 1.807971000  |
| C  | 0.049029000  | -3.804761000 | -1.808023000 |
| C  | 1.475914000  | -5.059618000 | 0.000000000  |
| C  | 0.049029000  | -3.804761000 | 1.808023000  |
| C  | -1.340857000 | -5.099419000 | 0.000000000  |
| C  | 2.196320000  | 3.107135000  | -1.807971000 |
| C  | 4.081899000  | 3.337893000  | 0.000000000  |
| C  | 3.633645000  | -1.128844000 | 1.808014000  |
| O  | -1.638849000 | 6.017703000  | 0.000000000  |
| O  | -2.190704000 | 2.935141000  | -2.933373000 |
| O  | -5.304074000 | 3.275750000  | 0.000000000  |
| O  | 1.473751000  | 6.056309000  | 0.000000000  |
| O  | 2.365887000  | -5.767636000 | 0.000000000  |
| O  | 0.046567000  | -3.662039000 | -2.933354000 |
| O  | -2.210077000 | -5.832774000 | 0.000000000  |
| O  | 0.046567000  | -3.662039000 | 2.933354000  |
| O  | 4.863151000  | -3.904728000 | 0.000000000  |
| O  | -6.229932000 | 0.299267000  | 0.000000000  |
| O  | -4.751277000 | -4.033781000 | 0.000000000  |
| O  | 5.216171000  | 3.420344000  | 0.000000000  |
| O  | 2.114322000  | 2.990459000  | -2.933315000 |
| O  | 6.216373000  | 0.468323000  | 0.000000000  |
| O  | 3.496883000  | -1.086915000 | -2.933304000 |
| O  | -2.190704000 | 2.935141000  | 2.933373000  |
| O  | 2.114322000  | 2.990459000  | 2.933315000  |
| O  | -3.468167000 | -1.175987000 | 2.933363000  |
| O  | -3.468167000 | -1.175987000 | -2.933363000 |
| O  | 3.496883000  | -1.086915000 | 2.933304000  |

## 25 [wB97XD/6-311+G(df,p)]

C<sub>s</sub>

|    |              |              |              |
|----|--------------|--------------|--------------|
| C  | 0.706586000  | -2.044381000 | 0.000000000  |
| C  | 1.771425000  | -1.240316000 | 0.000000000  |
| C  | 2.161739000  | 0.040197000  | 0.000000000  |
| C  | 1.726881000  | 1.301679000  | 0.000000000  |
| C  | 0.629892000  | 2.068885000  | 0.000000000  |
| C  | -0.704177000 | 2.044822000  | 0.000000000  |
| C  | -1.772732000 | 1.238376000  | 0.000000000  |
| C  | -2.161678000 | -0.038080000 | 0.000000000  |
| C  | -1.725179000 | -1.303575000 | 0.000000000  |
| C  | -0.631851000 | -2.068415000 | 0.000000000  |
| Fe | 3.745458000  | 1.292566000  | 0.000000000  |
| Fe | -0.072010000 | 3.962432000  | 0.000000000  |
| Fe | 2.387069000  | -3.163335000 | 0.000000000  |
| Fe | -2.270996000 | -3.247511000 | 0.000000000  |
| Fe | -3.789452000 | 1.155807000  | 0.000000000  |
| C  | 5.270008000  | 0.312503000  | 0.000000000  |
| C  | 4.339298000  | 3.004843000  | 0.000000000  |
| C  | 3.580835000  | 1.235419000  | 1.821674000  |
| C  | 3.580835000  | 1.235419000  | -1.821674000 |
| C  | 2.281861000  | -3.024568000 | -1.821714000 |
| C  | 4.199097000  | -3.198841000 | 0.000000000  |
| C  | 2.281861000  | -3.024568000 | 1.821714000  |
| C  | 1.926182000  | -4.916156000 | 0.000000000  |
| C  | -1.745585000 | -4.982065000 | 0.000000000  |
| C  | -3.622651000 | 1.105263000  | -1.821676000 |
| C  | -5.276330000 | 0.119460000  | 0.000000000  |
| C  | -4.446490000 | 2.844921000  | 0.000000000  |
| C  | -2.171340000 | -3.104613000 | 1.821673000  |
| C  | -0.068431000 | 3.788188000  | -1.821693000 |
| C  | -1.517397000 | 5.055883000  | 0.000000000  |
| C  | -0.068431000 | 3.788188000  | 1.821693000  |
| C  | 1.330880000  | 5.110000000  | 0.000000000  |
| C  | -2.171340000 | -3.104613000 | -1.821673000 |
| C  | -4.080488000 | -3.349928000 | 0.000000000  |
| C  | -3.622651000 | 1.105263000  | 1.821676000  |
| O  | 1.653444000  | -6.018439000 | 0.000000000  |
| O  | 2.182294000  | -2.893256000 | -2.942141000 |
| O  | 5.333943000  | -3.237915000 | 0.000000000  |
| O  | -1.432080000 | -6.073461000 | 0.000000000  |
| O  | -2.412778000 | 5.754232000  | 0.000000000  |
| O  | -0.065111000 | 3.623292000  | -2.942103000 |
| O  | 2.199014000  | 5.841951000  | 0.000000000  |
| O  | -0.065111000 | 3.623292000  | 2.942103000  |
| O  | -4.873838000 | 3.896960000  | 0.000000000  |
| O  | 6.234497000  | -0.286816000 | 0.000000000  |
| O  | 4.726773000  | 4.072218000  | 0.000000000  |
| O  | -5.213101000 | -3.431120000 | 0.000000000  |
| O  | -2.076978000 | -2.969330000 | -2.942086000 |
| O  | -6.217373000 | -0.516034000 | 0.000000000  |
| O  | -3.464811000 | 1.057416000  | -2.942083000 |
| O  | 2.182294000  | -2.893256000 | 2.942141000  |
| O  | -2.076978000 | -2.969330000 | 2.942086000  |
| O  | 3.425009000  | 1.181461000  | 2.942088000  |
| O  | 3.425009000  | 1.181461000  | -2.942088000 |
| O  | -3.464811000 | 1.057416000  | 2.942083000  |



## 26 [B3LYP/6-311+G(df,p)]

C<sub>1</sub>

|    |              |              |              |
|----|--------------|--------------|--------------|
| C  | 1.830604000  | -1.083480000 | 0.012036000  |
| C  | 2.134041000  | 0.182374000  | 0.012462000  |
| C  | 1.595481000  | 1.405990000  | -0.003652000 |
| C  | 0.485417000  | 2.086261000  | -0.010940000 |
| C  | -0.844327000 | 1.951154000  | -0.003922000 |
| C  | -1.833342000 | 1.104561000  | 0.008160000  |
| C  | -2.114567000 | -0.201787000 | 0.016413000  |
| C  | -1.617807000 | -1.405186000 | 0.005213000  |
| C  | -0.462596000 | -2.077656000 | -0.012554000 |
| C  | 0.835061000  | -1.975053000 | -0.008135000 |
| Ni | 2.059147000  | 3.395863000  | -0.048258000 |
| Ni | 3.866788000  | -0.907993000 | 0.070680000  |
| Ni | 0.332442000  | -3.959355000 | -0.072856000 |
| Ni | -2.594929000 | 3.005450000  | 0.000128000  |
| Ni | -3.661949000 | -1.537314000 | 0.052086000  |
| C  | 3.294691000  | 3.305600000  | -1.433328000 |
| C  | 1.101899000  | 4.924054000  | -0.309820000 |
| C  | 4.269017000  | -1.696381000 | -1.594147000 |
| C  | 4.154361000  | -2.082529000 | 1.483041000  |
| C  | 5.022281000  | 0.478768000  | 0.316553000  |
| C  | 2.016765000  | -4.636027000 | -0.227934000 |
| C  | -0.388627000 | -4.610271000 | 1.536754000  |
| C  | -0.617116000 | -4.564561000 | -1.558886000 |
| C  | -3.797765000 | -3.353424000 | 0.031812000  |
| C  | -4.566376000 | -0.902704000 | -1.456829000 |
| C  | -4.457638000 | -0.958535000 | 1.647421000  |
| C  | -4.353283000 | 2.570124000  | 0.194126000  |
| C  | -2.171539000 | 4.149266000  | 1.405805000  |
| C  | -2.410781000 | 3.849793000  | -1.674027000 |
| C  | 2.900956000  | 3.534823000  | 1.634245000  |
| O  | 5.728902000  | 1.353458000  | 0.481078000  |
| O  | 4.487089000  | -2.159202000 | -2.606565000 |
| O  | 4.305546000  | -2.782428000 | 2.363988000  |
| O  | 3.389108000  | 3.601464000  | 2.655910000  |
| O  | 0.492227000  | 5.867068000  | -0.484518000 |
| O  | -1.902898000 | 4.821128000  | 2.280477000  |
| O  | -5.445980000 | 2.284128000  | 0.319521000  |
| O  | -2.288972000 | 4.333467000  | -2.692886000 |
| O  | -4.910310000 | -0.609255000 | 2.627602000  |
| O  | -5.087439000 | -0.511623000 | -2.386138000 |
| O  | -3.869206000 | -4.487626000 | 0.023127000  |
| O  | -0.821906000 | -4.977927000 | 2.518642000  |
| O  | -1.184150000 | -4.904054000 | -2.481829000 |
| O  | 3.071937000  | -5.044404000 | -0.334557000 |
| O  | 4.027198000  | 3.231149000  | -2.297482000 |

## 26 [PBE0/6-311+G(df,p)]

C<sub>1</sub>

|    |              |              |              |
|----|--------------|--------------|--------------|
| C  | -0.590278000 | -2.044754000 | 0.006984000  |
| C  | 0.716343000  | -2.020260000 | -0.002238000 |
| C  | 1.763591000  | -1.193165000 | -0.011286000 |
| C  | 2.144634000  | 0.056883000  | -0.003796000 |
| C  | 1.682156000  | 1.308505000  | 0.010772000  |
| C  | 0.610692000  | 2.056764000  | 0.008159000  |
| C  | -0.722633000 | 2.003533000  | -0.006481000 |
| C  | -1.765043000 | 1.215223000  | -0.008119000 |
| C  | -2.127521000 | -0.068998000 | 0.002064000  |
| C  | -1.700362000 | -1.304219000 | 0.008497000  |
| Ni | 3.762599000  | -1.129059000 | -0.039159000 |
| Ni | 0.088419000  | -3.925906000 | 0.011149000  |
| Ni | -3.706143000 | -1.296795000 | 0.024096000  |
| Ni | 2.237112000  | 3.230319000  | 0.050330000  |
| Ni | -2.379829000 | 3.124293000  | -0.045518000 |
| C  | 4.005301000  | -2.119818000 | -1.583005000 |
| C  | 4.986257000  | 0.188611000  | -0.057443000 |
| C  | -0.879080000 | -4.512073000 | -1.445213000 |
| C  | -0.681813000 | -4.463181000 | 1.612155000  |
| C  | 1.717158000  | -4.682531000 | -0.084750000 |
| C  | -3.915895000 | -3.075112000 | 0.196461000  |
| C  | -4.572584000 | -0.508900000 | 1.442802000  |
| C  | -4.450172000 | -0.790389000 | -1.604780000 |
| C  | -4.134475000 | 2.769352000  | -0.223723000 |
| C  | -1.894818000 | 4.174027000  | -1.475792000 |
| C  | -2.135863000 | 4.007766000  | 1.573476000  |
| C  | 1.358442000  | 4.794834000  | 0.178156000  |
| C  | 3.339119000  | 3.111212000  | 1.523435000  |
| C  | 3.202449000  | 3.244583000  | -1.534754000 |
| C  | 4.050882000  | -2.144020000 | 1.480216000  |
| O  | 2.758201000  | -5.128716000 | -0.146453000 |
| O  | -1.478584000 | -4.828010000 | -2.353031000 |
| O  | -1.155996000 | -4.748340000 | 2.599908000  |
| O  | 4.184358000  | -2.756994000 | 2.423234000  |
| O  | 5.733682000  | 1.041721000  | -0.072421000 |
| O  | 3.991893000  | 3.004448000  | 2.443010000  |
| O  | 0.775169000  | 5.763615000  | 0.266907000  |
| O  | 3.771021000  | 3.213061000  | -2.513539000 |
| O  | -1.957008000 | 4.515483000  | 2.569390000  |
| O  | -1.571580000 | 4.786248000  | -2.372643000 |
| O  | -5.232471000 | 2.511367000  | -0.344400000 |
| O  | -5.065788000 | -0.008441000 | 2.331558000  |
| O  | -4.864252000 | -0.464595000 | -2.606704000 |
| O  | -4.015640000 | -4.199197000 | 0.311218000  |
| O  | 4.114573000  | -2.714536000 | -2.540524000 |

## 26 [wB97XD/6-311+G(df,p)]

C<sub>1</sub>

|    |              |              |              |
|----|--------------|--------------|--------------|
| C  | -1.705405000 | 1.253178000  | 0.017625000  |
| C  | -2.128115000 | 0.031111000  | -0.004389000 |
| C  | -1.714918000 | -1.247312000 | -0.028808000 |
| C  | -0.685020000 | -2.027794000 | -0.006824000 |
| C  | 0.658284000  | -2.032740000 | 0.039928000  |
| C  | 1.717356000  | -1.291935000 | 0.024861000  |
| C  | 2.140720000  | -0.017055000 | -0.028071000 |
| C  | 1.761002000  | 1.218995000  | -0.032568000 |
| C  | 0.679286000  | 2.016318000  | 0.003260000  |
| C  | -0.613683000 | 2.036745000  | 0.022611000  |
| Ni | -2.357338000 | -3.137501000 | -0.124646000 |
| Ni | -3.702818000 | 1.268226000  | 0.018830000  |
| Ni | 0.064378000  | 3.916965000  | 0.094182000  |
| Ni | 2.263370000  | -3.217273000 | 0.190252000  |
| Ni | 3.756399000  | 1.154172000  | -0.177131000 |
| C  | -3.212886000 | -3.021296000 | -1.800597000 |
| C  | -1.537222000 | -4.750836000 | -0.050326000 |
| C  | -3.881352000 | 2.707006000  | -1.112257000 |
| C  | -4.016654000 | 1.809685000  | 1.824826000  |
| C  | -4.945682000 | 0.022539000  | -0.422812000 |
| C  | -1.474816000 | 4.644367000  | 0.727728000  |
| C  | 1.450697000  | 4.511206000  | 1.133877000  |
| C  | 0.319835000  | 4.477483000  | -1.720674000 |
| C  | 3.948981000  | 2.859753000  | -0.768110000 |
| C  | 4.685792000  | 0.061577000  | -1.322080000 |
| C  | 4.463950000  | 1.012186000  | 1.593772000  |
| C  | 4.013461000  | -2.887474000 | 0.524072000  |
| C  | 1.630138000  | -4.252359000 | 1.588207000  |
| C  | 2.095927000  | -4.138881000 | -1.455860000 |
| C  | -3.598234000 | -3.014426000 | 1.255000000  |
| O  | -5.682185000 | -0.790812000 | -0.705362000 |
| O  | -3.922286000 | 3.582540000  | -1.829039000 |
| O  | -4.139645000 | 2.118815000  | 2.904225000  |
| O  | -4.326609000 | -2.874787000 | 2.109678000  |
| O  | -0.982191000 | -5.738161000 | -0.016722000 |
| O  | 1.212926000  | -4.832632000 | 2.465615000  |
| O  | 5.092331000  | -2.629236000 | 0.755352000  |
| O  | 1.942592000  | -4.650204000 | -2.452197000 |
| O  | 4.828074000  | 0.897109000  | 2.656872000  |
| O  | 5.200045000  | -0.632053000 | -2.054458000 |
| O  | 4.006297000  | 3.922255000  | -1.157755000 |
| O  | 2.315844000  | 4.812077000  | 1.799761000  |
| O  | 0.478718000  | 4.746645000  | -2.805940000 |
| O  | -2.454242000 | 5.037514000  | 1.140178000  |
| O  | -3.692215000 | -2.900161000 | -2.817207000 |
